# Supplementary material for: Using Non-Violent Discipline Tools: Evidence Suggesting the Importance of Attunement
Source: Int J Environ Res Public Health. 2023 Dec 15;20(24):7187. doi: 10.3390/ijerph20247187 (PMC10742770; doi:10.3390/ijerph20247187)
Supplement: Supplementary file 1 [file ijerph-20-07187-s001.zip]

Archive with 4 entries (4 files):
- File S1 - Summary of method and search strategy.pdf
- File S2 - PRISMA Flow Diagram.pdf
- File S3 - AMSTAR tables.pdf
- File S4 - Attuned discipline in practice.pdf
