# Supplementary figures and images for: Using Non-Violent Discipline Tools: Evidence Suggesting the Importance of Attunement
Source: MDPI journal article supplement (doi:10.3390/ijerph20247187), 2023-12-15

## Supplement 2: PRISMA Flow Diagram

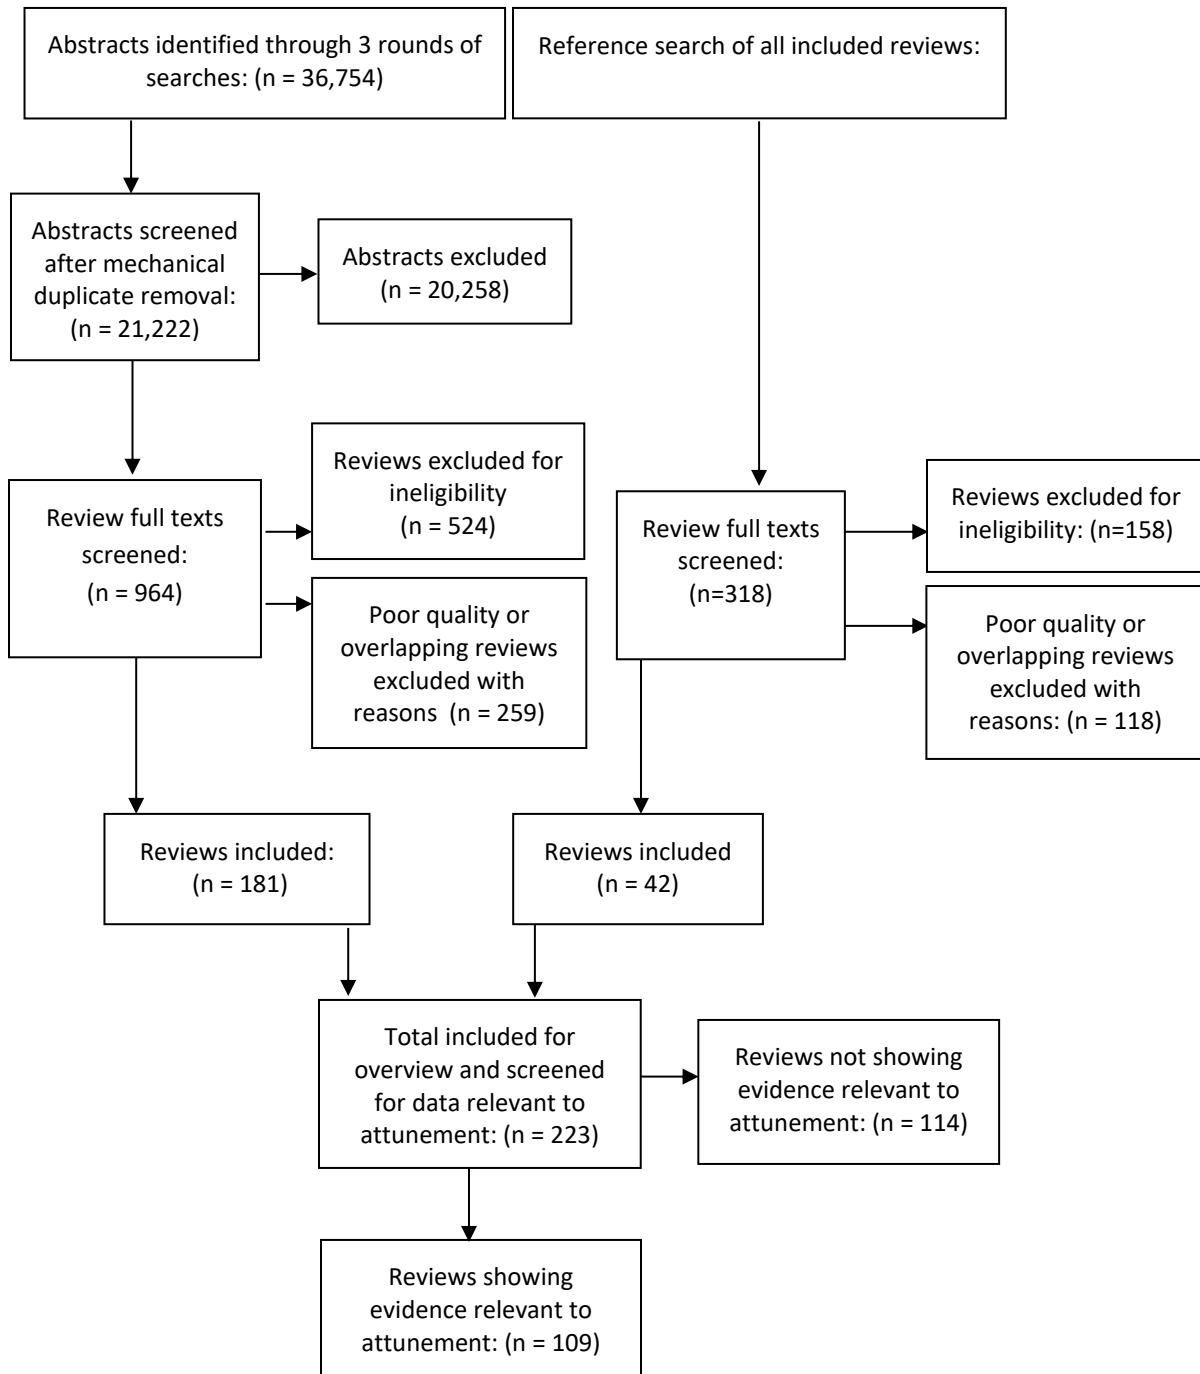

Supplement: s1 [file s1]
